# Supplementary material for: A multiplex approach for the UPLC-PDA-MS/MS data: analysis of licorice
Source: Royal Society of Chemistry journal article supplement (doi:10.1039/c3ay41861h), 2014-01-01
Supplement: c3ay41861h1.pdf [file c3ay41861h1.pdf]

1 Supplementary information 2

2

| No. | Time (min) | $\lambda_{\max}$ (nm) | Negative ions (m/z) |                                                                                                                                                                                  | Positive ions (m/z)      |                                                             | Identification                                                         |                                                 |
|-----|------------|-----------------------|---------------------|----------------------------------------------------------------------------------------------------------------------------------------------------------------------------------|--------------------------|-------------------------------------------------------------|------------------------------------------------------------------------|-------------------------------------------------|
|     |            |                       | [M-H] <sup>-</sup>  | MS <sup>2</sup>                                                                                                                                                                  | [M+H] <sup>+</sup>       | MS <sup>2</sup>                                             |                                                                        |                                                 |
| 1   | 4.28       | 270, 315              | 579                 | 579→417 [M-H-glc] <sup>-</sup> ,<br>255[M-H-2glc] <sup>-</sup>                                                                                                                   | -                        | -                                                           | Glucoliquiritin (Liquiritigenin<br>-7,4'-diglucoside) <sup>38,39</sup> | C <sub>27</sub> H <sub>32</sub> O <sub>14</sub> |
| 2   | 4.48       | 272, 336              | 593                 | -                                                                                                                                                                                | 595                      | -                                                           | Vicenin-2 <sup>40, 41</sup>                                            | C <sub>27</sub> H <sub>30</sub> O <sub>15</sub> |
| 3   | 4.75       | 270, 336              | 563                 | -                                                                                                                                                                                | 565                      | -                                                           | Schaftoside <sup>36, 43</sup>                                          | C <sub>26</sub> H <sub>28</sub> O <sub>14</sub> |
| 4   | 4.93       | 270, 360              | 579                 | 579→417 [M-H-glc] <sup>-</sup> ,<br>255[M-H-2glc] <sup>-</sup>                                                                                                                   | 581                      | -                                                           | Glucosoliquiritin <sup>38</sup>                                        | C <sub>27</sub> H <sub>32</sub> O <sub>14</sub> |
| 5   | 5.00       | 225, 272, 335         | 577                 | 577→485 [M-H-C <sub>6</sub> H <sub>4</sub> O] <sup>-</sup> ,<br>473, 383                                                                                                         | 579                      | -                                                           | Isoviolanthin <sup>36,44, 45</sup>                                     | C <sub>27</sub> H <sub>30</sub> O <sub>14</sub> |
| 6   | 5.31       | 219, 275, 310         | 549                 | 549→417 [M-H-api] <sup>-</sup> ,<br>255 [M-H-api-glc] <sup>-</sup> , 135                                                                                                         | 573, 551, 419, 257,      | 551→257[M+H- api-glc] <sup>+</sup> , 137                    | Liquiritin apioside <sup>37,44</sup>                                   | C <sub>26</sub> H <sub>30</sub> O <sub>13</sub> |
| 7   | 5.45       | 219, 276, 310         | 417, 835            | 417→255 [M-H-glc] <sup>-</sup> ,<br>135,119                                                                                                                                      | 837, 440, 419, 257       | 419→257 [M+H-glc] <sup>+</sup> , 239, 211,<br>163, 147, 137 | Liquiritin* <sup>38,44,43</sup>                                        | C <sub>21</sub> H <sub>22</sub> O <sub>9</sub>  |
| 8   | 5.53       | 190                   | 723                 | -                                                                                                                                                                                | 340 [M+H],<br>679 [2M+H] | -                                                           | unassigned                                                             |                                                 |
| 9   | 5.66       | 190                   | 836                 | -                                                                                                                                                                                | 396, 792 [M+H]           | -                                                           | unassigned                                                             |                                                 |
| 10  | 5.78       | 287                   | 949                 | -                                                                                                                                                                                | 453 [M+H]                | -                                                           | unassigned                                                             |                                                 |
| 11  | 5.98       | 288                   | 433                 | 433→271 [M-H-glc] <sup>-</sup> ,<br>151                                                                                                                                          | -                        | -                                                           | 5-Hydroxylliquiritin <sup>37</sup>                                     | C <sub>21</sub> H <sub>22</sub> O <sub>10</sub> |
| 12  | 6.08       | 365                   | 549                 | 549→255 [M-H-api -glc] <sup>-</sup> ,<br>, 135                                                                                                                                   | 573, 551, 419, 257       | 551→257[M+H- api-glc] <sup>+</sup> , 239,<br>137, 115       | Isoliquiritin apioside <sup>36,38</sup>                                | C <sub>26</sub> H <sub>30</sub> O <sub>13</sub> |
| 13  | 6.29       | 280, 310              | 429+46              | -                                                                                                                                                                                | 431                      | 431→269 [M-H-glc] <sup>+</sup>                              | Ononin <sup>42,46</sup>                                                | C <sub>22</sub> H <sub>22</sub> O <sub>9</sub>  |
| 14  | 6.29       | -                     | 695                 | 695→549 [M-H-C <sub>9</sub> O <sub>2</sub> H <sub>6</sub> ] <sup>-</sup> ,<br>531[M-H-C <sub>9</sub> O <sub>2</sub> H <sub>6</sub> -H <sub>2</sub> O] <sup>-</sup> ,<br>399, 255 | -                        | -                                                           | Licorice glycoside D <sub>2</sub> /D <sub>1</sub> <sup>38</sup>        | C <sub>35</sub> H <sub>36</sub> O <sub>15</sub> |
| 15  | 6.31       | 370                   | 417, 835            | 417→255 [M-H-glc] <sup>-</sup> ,<br>135,119                                                                                                                                      | 837, 419                 | 419→257 [M+H-glc] <sup>+</sup> ,<br>211, 147, 137           | Isoliquiritin* <sup>37,43</sup>                                        | C <sub>21</sub> H <sub>22</sub> O <sub>9</sub>  |

|    |      |               |     |                                                                                                                                                                                                                                                                                                                                                          |          |                                                                                                                                                                                                    |                                                                           |                                                      |
|----|------|---------------|-----|----------------------------------------------------------------------------------------------------------------------------------------------------------------------------------------------------------------------------------------------------------------------------------------------------------------------------------------------------------|----------|----------------------------------------------------------------------------------------------------------------------------------------------------------------------------------------------------|---------------------------------------------------------------------------|------------------------------------------------------|
| 16 | 6.35 | 230, 325, 370 | 725 | 725→549 [M-H-C <sub>10</sub> O <sub>3</sub> H <sub>8</sub> ] <sup>-</sup> ,<br>531 [M-H-C <sub>10</sub> O <sub>3</sub> H <sub>8</sub> -H <sub>2</sub> O] <sup>-</sup> ,<br>399[M-H- C <sub>10</sub> O <sub>3</sub> H <sub>8</sub> -api-H <sub>2</sub> O] <sup>-</sup> ,<br>255 [M-H-C <sub>10</sub> O <sub>3</sub> H <sub>8</sub> -api-glc] <sup>-</sup> | -        | -                                                                                                                                                                                                  | Licorice glycoside A (C <sub>1</sub> or C <sub>2</sub> ) <sup>47</sup>    | C <sub>36</sub> H <sub>38</sub> O <sub>16</sub>      |
| 17 | 6.59 | 278, 320      | 692 | 692→549[M-H-C <sub>9</sub> NOH <sub>5</sub> ] <sup>-</sup> ,<br>255                                                                                                                                                                                                                                                                                      | 694      | -                                                                                                                                                                                                  | Licorice glycoside E <sup>38</sup>                                        | C <sub>35</sub> H <sub>35</sub> N<br>O <sub>14</sub> |
| 18 | 6.65 | 250           | 823 | -                                                                                                                                                                                                                                                                                                                                                        | 825      | -                                                                                                                                                                                                  | Licorice saponin J <sub>2</sub> <sup>37, 38, 46</sup>                     | C <sub>42</sub> H <sub>64</sub> O <sub>16</sub>      |
| 19 | 6.78 | 250           | 984 | -                                                                                                                                                                                                                                                                                                                                                        | 986      | -                                                                                                                                                                                                  | Licoricesaponine A <sub>3</sub> <sup>48</sup>                             | C <sub>48</sub> H <sub>72</sub> O <sub>21</sub>      |
| 20 | 6.99 | 236, 275, 315 | 255 | 255→135 (cleavage CO),<br>119                                                                                                                                                                                                                                                                                                                            | 257      | 257→239, 211, 197, 165, 137, 119                                                                                                                                                                   | Liquiritigenin* <sup>37</sup>                                             | C <sub>15</sub> H <sub>12</sub> O <sub>4</sub>       |
| 21 | 7.29 | -             | 983 | -                                                                                                                                                                                                                                                                                                                                                        | 985      | -                                                                                                                                                                                                  | Licorice saponin A <sub>3</sub> <sup>38</sup>                             | C <sub>48</sub> H <sub>72</sub> O <sub>21</sub>      |
| 22 | 7.30 | 250           | 879 | 879→351<br>[2×C <sub>6</sub> H <sub>8</sub> O <sub>6</sub> -H] <sup>-</sup>                                                                                                                                                                                                                                                                              | 881      | 881→705 [M+H-C <sub>6</sub> H <sub>8</sub> O <sub>6</sub> ] <sup>+</sup> ,<br>511 [M+H-C <sub>6</sub> H <sub>8</sub> O <sub>6</sub> - C <sub>6</sub> H <sub>10</sub> O <sub>7</sub> ] <sup>+</sup> | 22β-Acetoxyglycyrrhizic acid <sup>37, 49</sup>                            | C <sub>44</sub> H <sub>64</sub> O <sub>18</sub>      |
| 23 | 7.35 | 250           | 837 | -                                                                                                                                                                                                                                                                                                                                                        | 839      | 839→487,469 [M+H-C <sub>6</sub> H <sub>8</sub> O <sub>6</sub> - C <sub>6</sub> H <sub>10</sub> O <sub>7</sub> ] <sup>+</sup>                                                                       | Yunganoside K <sub>2</sub> <sup>37,46</sup>                               | C <sub>42</sub> H <sub>62</sub> O <sub>17</sub>      |
| 24 | 7.65 | 310, 370      | 269 | -                                                                                                                                                                                                                                                                                                                                                        | 271      | -                                                                                                                                                                                                  | Echinatin <sup>47, 50</sup>                                               | C <sub>16</sub> H <sub>14</sub> O <sub>4</sub>       |
| 25 | 7.82 | 250           | 819 | -                                                                                                                                                                                                                                                                                                                                                        | 821      | 821→645 [M+H-C <sub>6</sub> H <sub>8</sub> O <sub>6</sub> ] <sup>+</sup> ,<br>451, 469                                                                                                             | Licorice saponin E <sub>2</sub> <sup>36</sup>                             | C <sub>42</sub> H <sub>60</sub> O <sub>16</sub>      |
| 26 | 7.96 | 250           | 837 | 837→351                                                                                                                                                                                                                                                                                                                                                  | 839, 861 | 839→487,469                                                                                                                                                                                        | Licorice saponin G <sub>2</sub> (24-hydroxyglycyrrhizin) <sup>37,46</sup> | C <sub>42</sub> H <sub>62</sub> O <sub>17</sub>      |
| 27 | 8.00 | 252           | 985 | -                                                                                                                                                                                                                                                                                                                                                        | 987      | 987→471                                                                                                                                                                                            | Yunganoside G <sub>1</sub> <sup>38</sup>                                  | C <sub>48</sub> H <sub>74</sub> O <sub>21</sub>      |
| 28 | 8.19 | 251           | 837 | 837→351                                                                                                                                                                                                                                                                                                                                                  | 839      | 839→487,469                                                                                                                                                                                        | Isomer of Licorice saponin G <sub>2</sub> <sup>37,46</sup>                | C <sub>42</sub> H <sub>62</sub> O <sub>17</sub>      |
| 29 | 8.21 | 251           | 839 | 839→487, 469                                                                                                                                                                                                                                                                                                                                             | 841      | 841→489, 471                                                                                                                                                                                       | Yunganoside G <sub>2</sub> <sup>38</sup>                                  | C <sub>42</sub> H <sub>64</sub> O <sub>17</sub>      |
| 30 | 8.30 | 251           | 821 | 821→759 [M-H-CO <sub>2</sub> -H <sub>2</sub> O] <sup>+</sup> ,<br>351 [2×C <sub>6</sub> H <sub>8</sub> O <sub>6</sub> -H] <sup>-</sup> , 193                                                                                                                                                                                                             | 823, 453 | 823→647 [M+H-C <sub>6</sub> H <sub>8</sub> O <sub>6</sub> ] <sup>+</sup> ,<br>453 [M+H-C <sub>6</sub> H <sub>8</sub> O <sub>6</sub> - C <sub>6</sub> H <sub>10</sub> O <sub>7</sub> ] <sup>+</sup> | Glycyrrhizin* <sup>37</sup>                                               | C <sub>42</sub> H <sub>62</sub> O <sub>16</sub>      |
| 31 | 8.39 | 370           | 255 | 255→135, 119                                                                                                                                                                                                                                                                                                                                             | 257      | 257→137                                                                                                                                                                                            | Isoliquiritigenin* <sup>37</sup>                                          | C <sub>15</sub> H <sub>12</sub> O <sub>4</sub>       |
| 32 | 8.45 | 251, 305      | 267 | -                                                                                                                                                                                                                                                                                                                                                        | 269, 291 | -                                                                                                                                                                                                  | Formononetin <sup>37, 51, 52</sup>                                        | C <sub>16</sub> H <sub>12</sub> O <sub>4</sub>       |
| 33 | 8.62 | 252           | 821 | 821→759 [M-H-CO <sub>2</sub> -H <sub>2</sub> O] <sup>+</sup> ,<br>351 [2×C <sub>6</sub> H <sub>8</sub> O <sub>6</sub> -H] <sup>-</sup> , 193                                                                                                                                                                                                             | 823, 453 | 823→647 [M+H-glc] <sup>+</sup> ,<br>453 [M+H-C <sub>6</sub> H <sub>8</sub> O <sub>6</sub> - C <sub>6</sub> H <sub>10</sub> O <sub>7</sub> ] <sup>+</sup>                                           | Glycyrrhizin isomer <sup>38</sup>                                         | C <sub>42</sub> H <sub>62</sub> O <sub>16</sub>      |
| 34 | 8.69 | -             | 955 | -                                                                                                                                                                                                                                                                                                                                                        | 957      | -                                                                                                                                                                                                  | Yunganoside A <sub>1</sub> <sup>37</sup>                                  | C <sub>48</sub> H <sub>76</sub> O <sub>19</sub>      |
| 35 | 9.00 | 230, 285      | -   | -                                                                                                                                                                                                                                                                                                                                                        | 271      | -                                                                                                                                                                                                  | Medicarpin <sup>53, 54</sup>                                              | C <sub>14</sub> H <sub>14</sub> O <sub>4</sub>       |

|    |       |          |          |                                                                                                                              |          |                                  |                                                     |                                                 |
|----|-------|----------|----------|------------------------------------------------------------------------------------------------------------------------------|----------|----------------------------------|-----------------------------------------------------|-------------------------------------------------|
| 36 | 9.18  | 250      | 821      | 821→351 [2×C <sub>6</sub> H <sub>8</sub> O <sub>6</sub> -H] <sup>-</sup>                                                     | 845, 823 | -                                | Uralsaponin B <sup>37,55</sup>                      | C <sub>42</sub> H <sub>62</sub> O <sub>16</sub> |
| 37 | 9.35  | -        | 823      | -                                                                                                                            | 825      | -                                | Licorice saponin J <sub>2</sub> <sup>37</sup>       | C <sub>42</sub> H <sub>64</sub> O <sub>16</sub> |
| 38 | 9.38  | 350      | 367      | 367→309 [M-H-C <sub>4</sub> H <sub>10</sub> ] <sup>-</sup> ,<br>297 [M-H-C <sub>5</sub> H <sub>10</sub> ] <sup>-</sup> , 281 | 369      | 369→313, 300, 283, 267, 165      | Glycycomarin <sup>36</sup>                          | C <sub>21</sub> H <sub>20</sub> O <sub>6</sub>  |
| 39 | 9.45  | 283      | 354      | -                                                                                                                            | 356      | -                                | Tetrahydropalmatine <sup>48</sup>                   | C <sub>21</sub> H <sub>25</sub> NO <sub>4</sub> |
| 40 | 9.61  | -        | 805      | -                                                                                                                            | -        | -                                | Licorice saponin C <sub>2</sub> <sup>37</sup>       | C <sub>42</sub> H <sub>62</sub> O <sub>15</sub> |
| 41 | 9.69  | -        | 353      | 353→323                                                                                                                      | -        | -                                | Licochalcone D <sup>56</sup>                        | C <sub>21</sub> H <sub>22</sub> O <sub>5</sub>  |
| 42 | 9.72  | 262      | 351      | 351→335, 321, 295, 283                                                                                                       | 353      | -                                | Licoisoflavone B <sup>37, 57</sup>                  | C <sub>20</sub> H <sub>16</sub> O <sub>6</sub>  |
| 43 | 9.82  | 262      | 353      | 353→297                                                                                                                      | -        | -                                | Licoisoflavone A <sup>56</sup>                      | C <sub>21</sub> H <sub>22</sub> O <sub>5</sub>  |
| 44 | 9.98  | 250      | 483      | -                                                                                                                            | 485      | -                                | Methylglycyrrhetate <sup>48</sup>                   | C <sub>31</sub> H <sub>48</sub> O <sub>4</sub>  |
| 45 | 10.06 | 228, 288 | 353      | 353→285                                                                                                                      | -        | -                                | Gancaonin L <sup>56</sup>                           | C <sub>20</sub> H <sub>18</sub> O <sub>6</sub>  |
| 46 | 10.51 | 310, 370 | 337      | 337→281                                                                                                                      | 339      | -                                | Licochalcone C <sup>38</sup>                        | C <sub>21</sub> H <sub>22</sub> O <sub>4</sub>  |
| 47 | 10.55 | 280, 330 | 371      | 371→231, 109 [C <sub>6</sub> O <sub>2</sub> H <sub>5</sub> ] <sup>-</sup>                                                    | 373      | -                                | Licoleafol <sup>38</sup>                            | C <sub>21</sub> H <sub>24</sub> O <sub>6</sub>  |
| 48 | 10.58 | -        | 365      | -                                                                                                                            | 367      | -                                | Isoglycyrol <sup>36</sup>                           | C <sub>21</sub> H <sub>18</sub> O <sub>6</sub>  |
| 49 | 10.68 | 315, 368 | 337      | 337→305, 281 [M-H-<br>C <sub>4</sub> H <sub>8</sub> ] <sup>-</sup>                                                           | 339      | -                                | Licochalcone A <sup>47, 58</sup>                    | C <sub>21</sub> H <sub>22</sub> O <sub>4</sub>  |
| 50 | 10.90 | 262, 335 | 353      | 353→297                                                                                                                      | 355      | -                                | Licobenzofuran <sup>56</sup>                        | C <sub>21</sub> H <sub>22</sub> O <sub>5</sub>  |
| 51 | 10.94 | 265      | 351      | 351→321, 283, 263, 241                                                                                                       | 353      | -                                | Gancaonin M <sup>37</sup>                           | C <sub>21</sub> H <sub>20</sub> O <sub>5</sub>  |
| 52 | 11.17 | 281      | 369      | 369→339, 295, 203, 177,<br>135                                                                                               | 371      | 371→193, 181, 167, 137, 123      | Glyasperin D <sup>37, 58</sup>                      | C <sub>22</sub> H <sub>26</sub> O <sub>5</sub>  |
| 53 | 11.25 | -        | 335      | -                                                                                                                            | 337      | 337→293, 265, 153                | Glabrone <sup>37</sup>                              | C <sub>20</sub> H <sub>16</sub> O <sub>5</sub>  |
| 54 | 11.46 | 285      | 423      | -                                                                                                                            | 425      | 425→369, 313, 221, 191, 165, 135 | Licoricidin (Licorisoflavan B)<br><sup>47, 44</sup> | C <sub>26</sub> H <sub>32</sub> O <sub>5</sub>  |
| 55 | 11.65 | 295      | 423      | -                                                                                                                            | 425      | 425→313, 147, 135                | Glisoflavanone <sup>59</sup>                        | C <sub>25</sub> H <sub>28</sub> O <sub>6</sub>  |
| 56 | 11.85 | -        | 423      | -                                                                                                                            | 425      | 425→369, 191, 135                | Kanzonol H <sup>38</sup>                            | C <sub>26</sub> H <sub>32</sub> O <sub>5</sub>  |
| 57 | 12.11 | 265      | 421      | 421→365, 351, 311                                                                                                            | 423      | -                                | 1-Methoxyficifolinol <sup>37, 61</sup>              | C <sub>25</sub> H <sub>26</sub> O <sub>6</sub>  |
| 58 | 12.44 | 228, 292 | 421      | 421→365,<br>193 [C <sub>9</sub> O <sub>5</sub> H <sub>5</sub> ] <sup>-</sup>                                                 | 423      | -                                | Glyasperin A <sup>37, 60</sup>                      | C <sub>26</sub> H <sub>30</sub> O <sub>5</sub>  |
| 59 | 12.90 | 282      | 437      | -                                                                                                                            | 439      | -                                | Licorisoflavan A <sup>38, 61</sup>                  | C <sub>27</sub> H <sub>34</sub> O <sub>5</sub>  |
| 60 | 12.96 | 250      | 469, 939 | 469→425 [M-H-CO <sub>2</sub> ] <sup>-</sup>                                                                                  | 471, 941 | -                                | 18-β-Glycyrrhetic acid* <sup>44</sup>               | C <sub>30</sub> H <sub>46</sub> O <sub>4</sub>  |

3 \* The compounds has been identified using reference substance
